# Supplementary material for: Sediment heterogeneity affects variability of resuspension-induced CO 2 production
Source: Copernicus journal article supplement (doi:10.5194/egusphere-2025-3045), 2025-07-08
Supplement: Supplementary file 1 [file egusphere-2025-3045-supplement.pdf]

Supplementary material

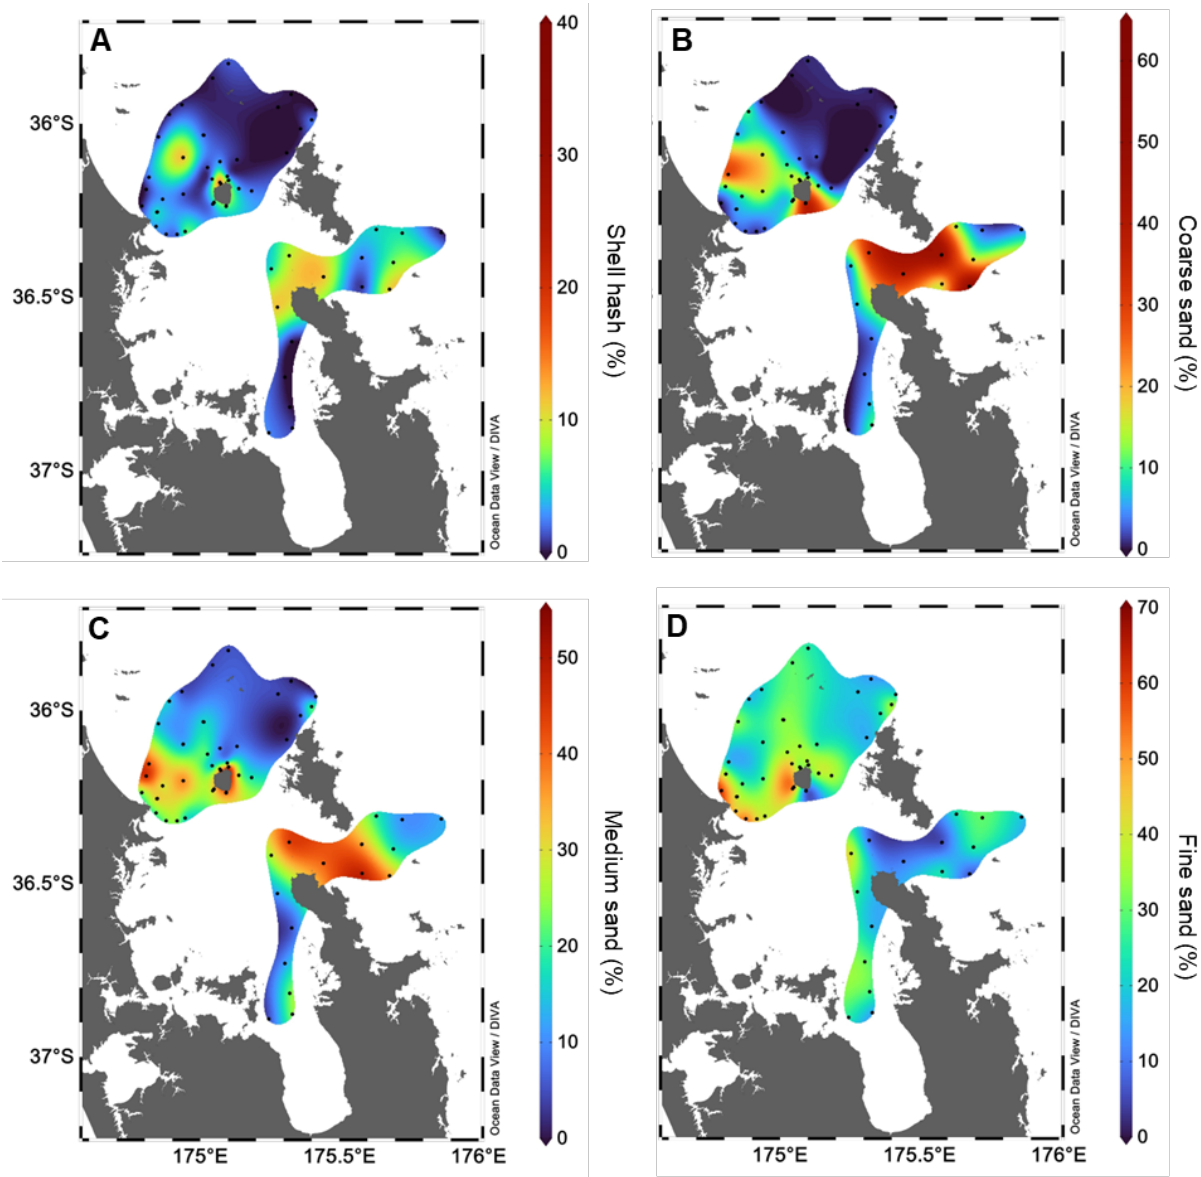

Figure S1: Contents of A) shell hash (>2000  $\mu\text{m}$ ), B) coarse sand (500 – 2000  $\mu\text{m}$ ), C) medium sand (250 – 500  $\mu\text{m}$ ) and D) fine sand (63 – 250  $\mu\text{m}$ ) at the sampling sites (black dots) in the Hauraki Gulf, New Zealand. Data were spatially interpolated using DIVA in Ocean Data View (Schlitzer, 2025).

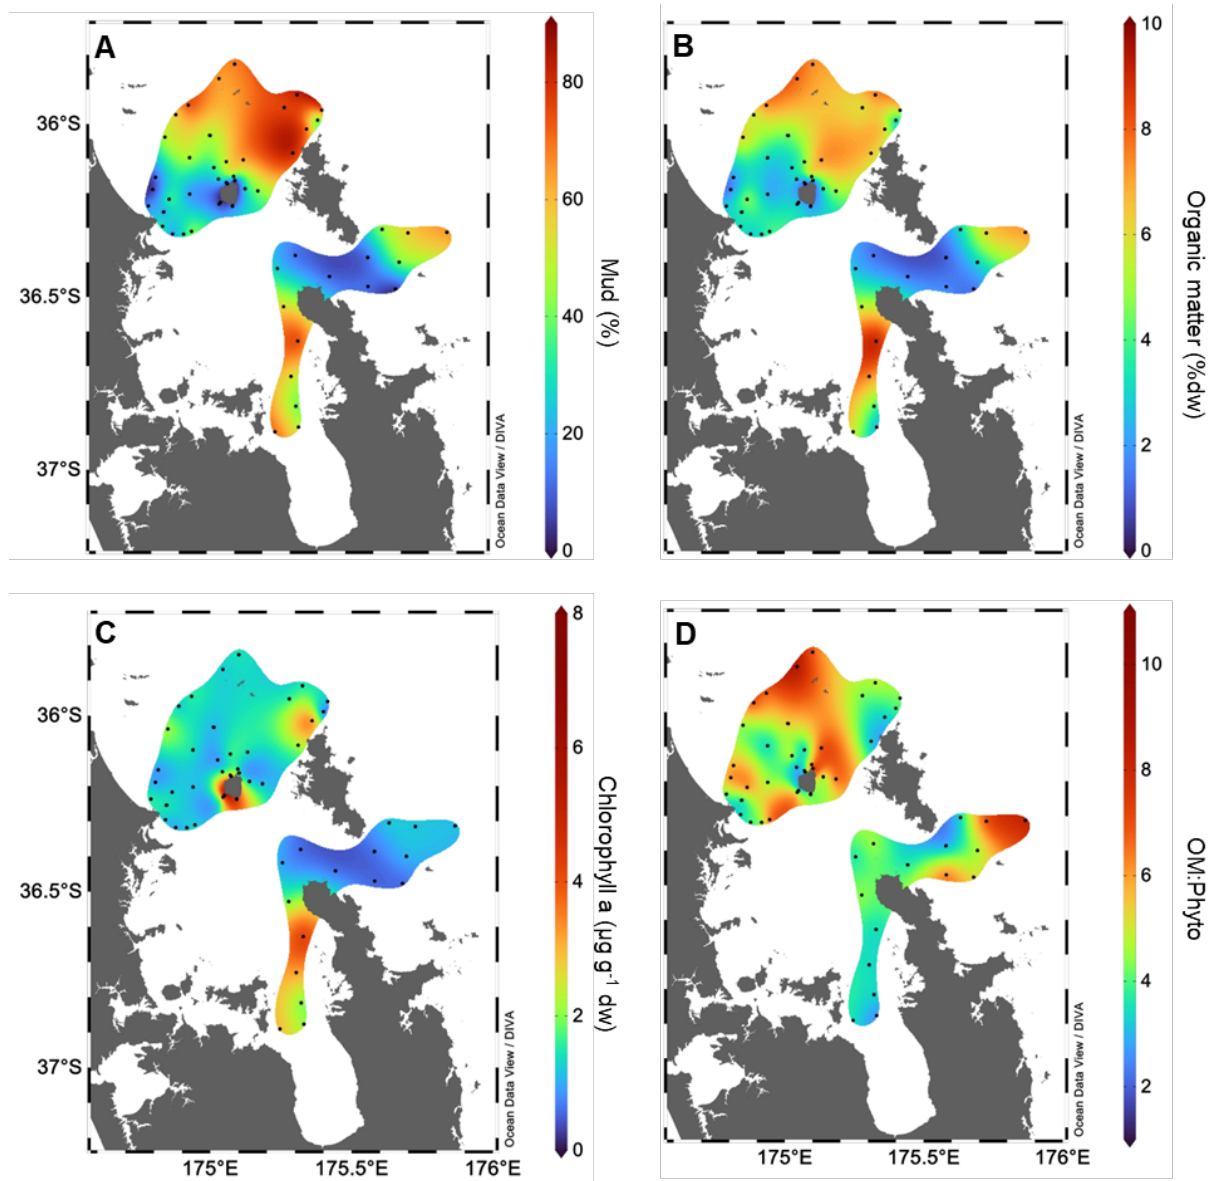

**Figure S2:** Contents of A) mud (< 63  $\mu\text{m}$ ), B) organic matter (LOI), C) chlorophyll a and D) the ratio of OM to phytopigments representing freshness of organic matter (OM:Phyto) at the sampling sites (black dots) in the Hauraki Gulf, New Zealand. Data were spatially interpolated using DIVA in Ocean Data View (Schlitzer, 2025)
